# Supplementary material for: A Large Panel of Drosophila simulans Reveals an Abundance of Common Variants
Source: PubMed Central journal article supplement — Genome Biol Evol. 2017 Dec 8;10(1):189–206. doi: 10.1093/gbe/evx262 (PMC5767965; doi:10.1093/gbe/evx262), 2017-12-08
Supplement: evx262_supp.pdf [file evx262_supp.pdf]

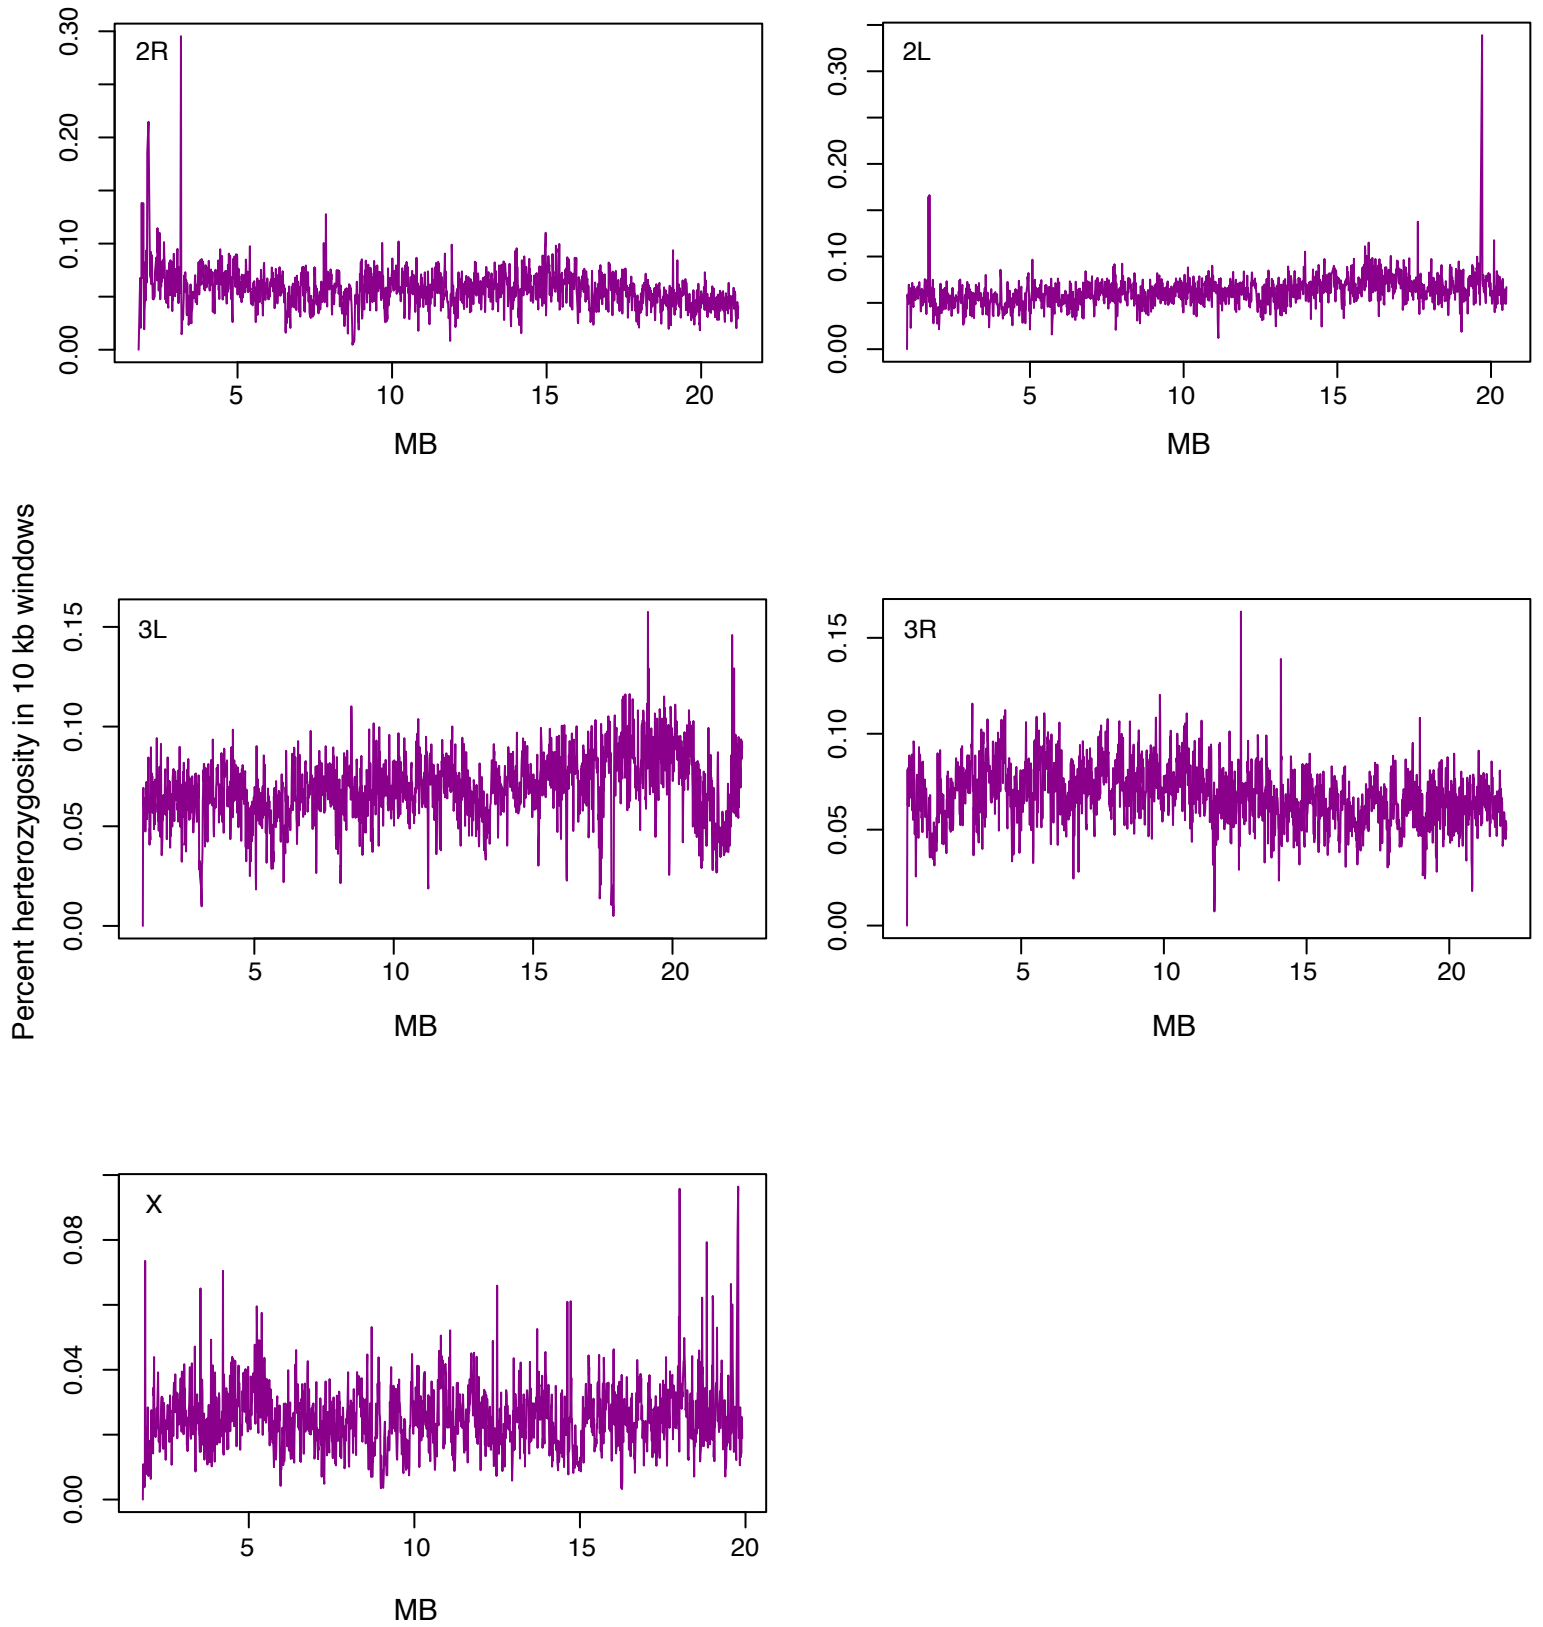

S1 Figure: Distribution of heterozygosity in *D. simulans*. In *D. melanogaster* residual heterozygosity in inbred lines is retained in large part due to segregating inversions. This does not appear to be the case in *D. simulans*, where residual heterozygosity was spread throughout the genome at relatively even background levels.

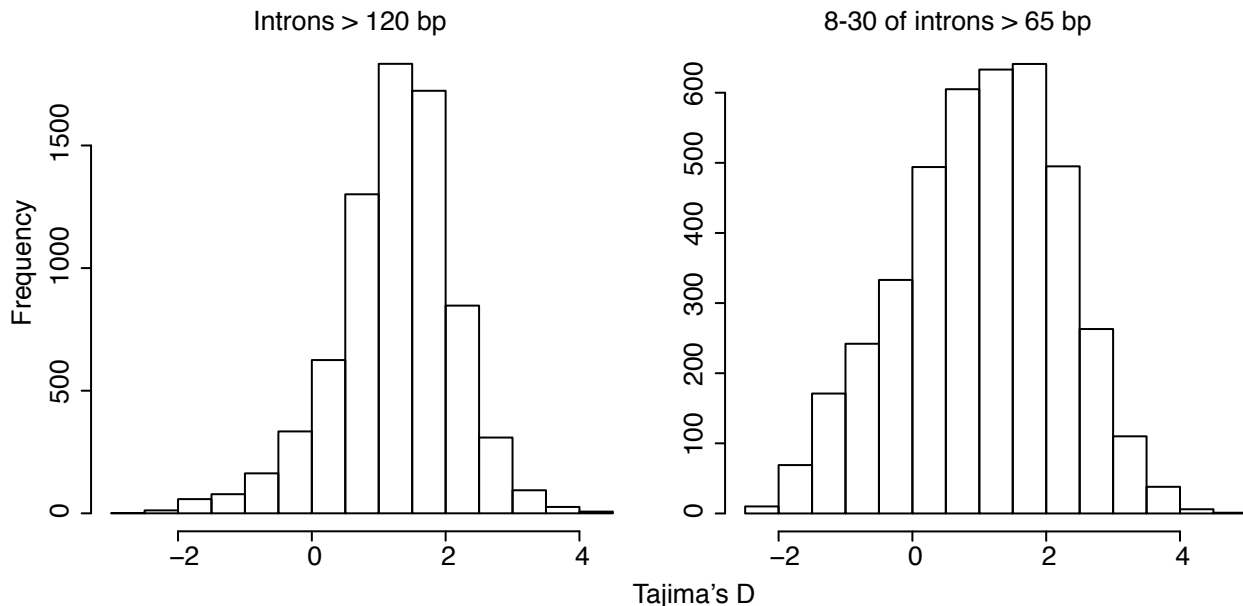

S2 Figure: The distribution of Tajima's  $D$  values for long introns is narrow compared to other annotation categories. To investigate this we plotted the frequency of Tajima's  $D$  values in long introns and in bp 8-30 of introns < 65 bp. The mean of long introns is 1.24, and the variance is 0.8, while for bp 8-30 of introns < 65 bp the mean is 1.02 and the variance is 1.4. The spread of values is quite different in long introns, indicating perhaps that different selective forces are affecting long introns compared to other annotation categories.

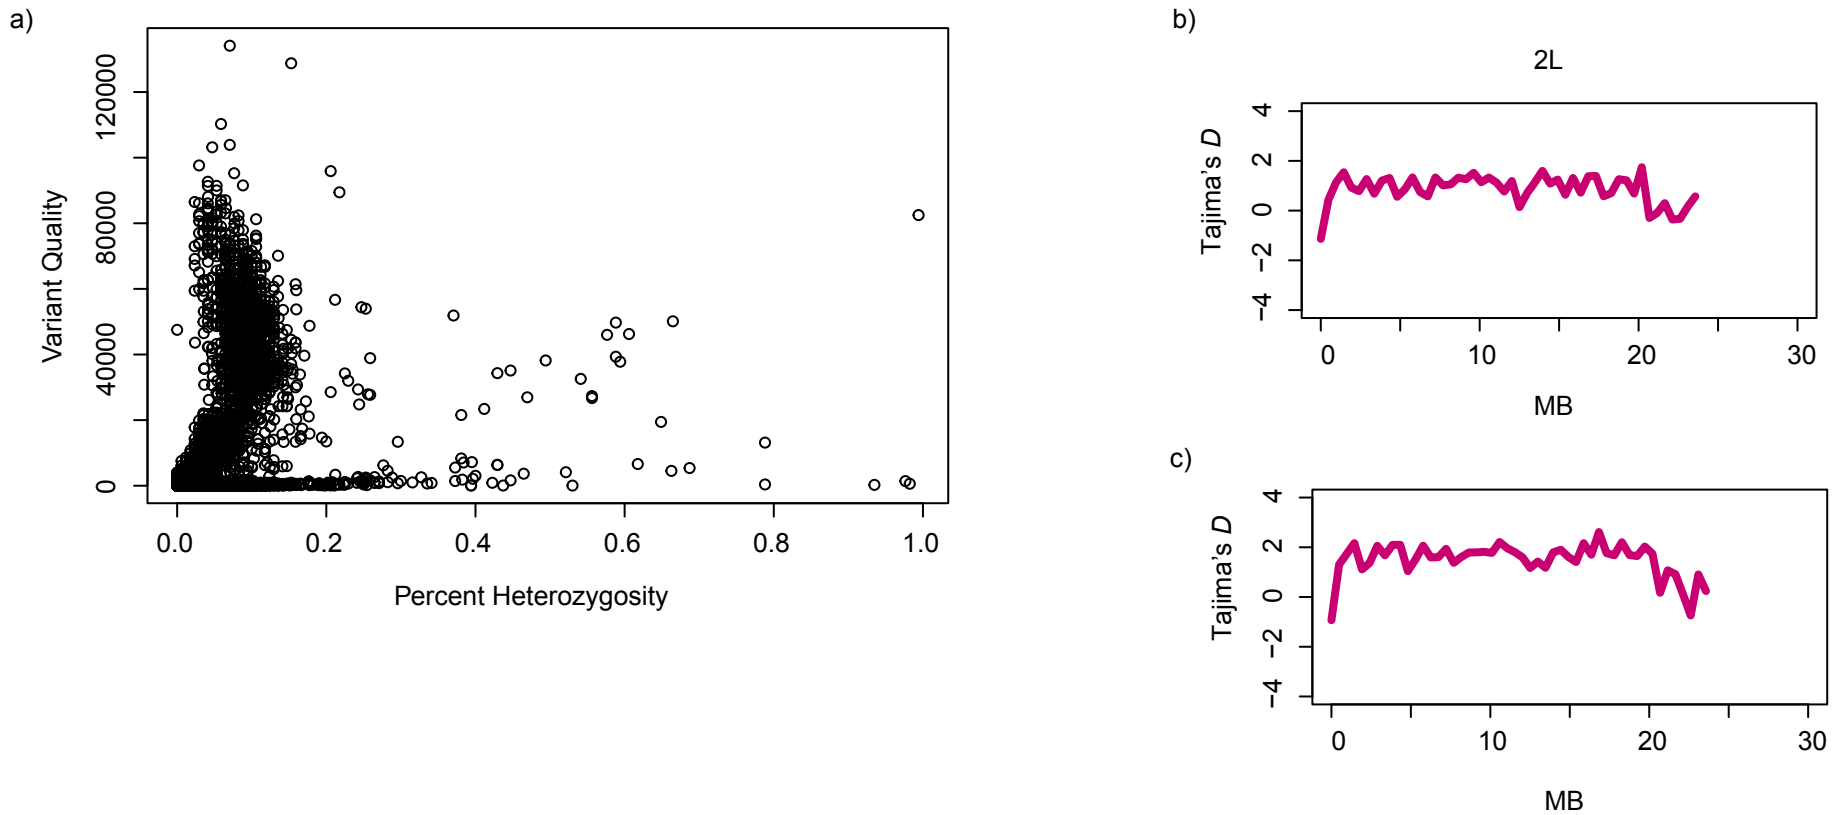

S3 Figure: Analysis of methodological artifacts in the *D. simulans* data. a) We examined the relationship between variant quality and heterozygosity. For some low quality SNPs there is a relationship between heterozygosity and quality, but for the majority of SNPs there is no clear relationship. Overall variant quality is high, and heterozygosity is within expected levels. *D. simulans* does not have segregating inversions so while in *D. melanogaster* excluded regions of the genome can reach up to 1/3 of the total the % excluded here is much lower. b) We also compared Tajima's  $D$  when all SNPs with missing data were excluded to see what effect this had on the data. The lines is loess smoothed to a span of 0.005. While there are small differences in the exact values of Tajima's  $D$ , overall the qualitative trend is the same. c) Tajima's  $D$  when heterozygous bases are excluded from the analysis - again the results are not qualitatively different.

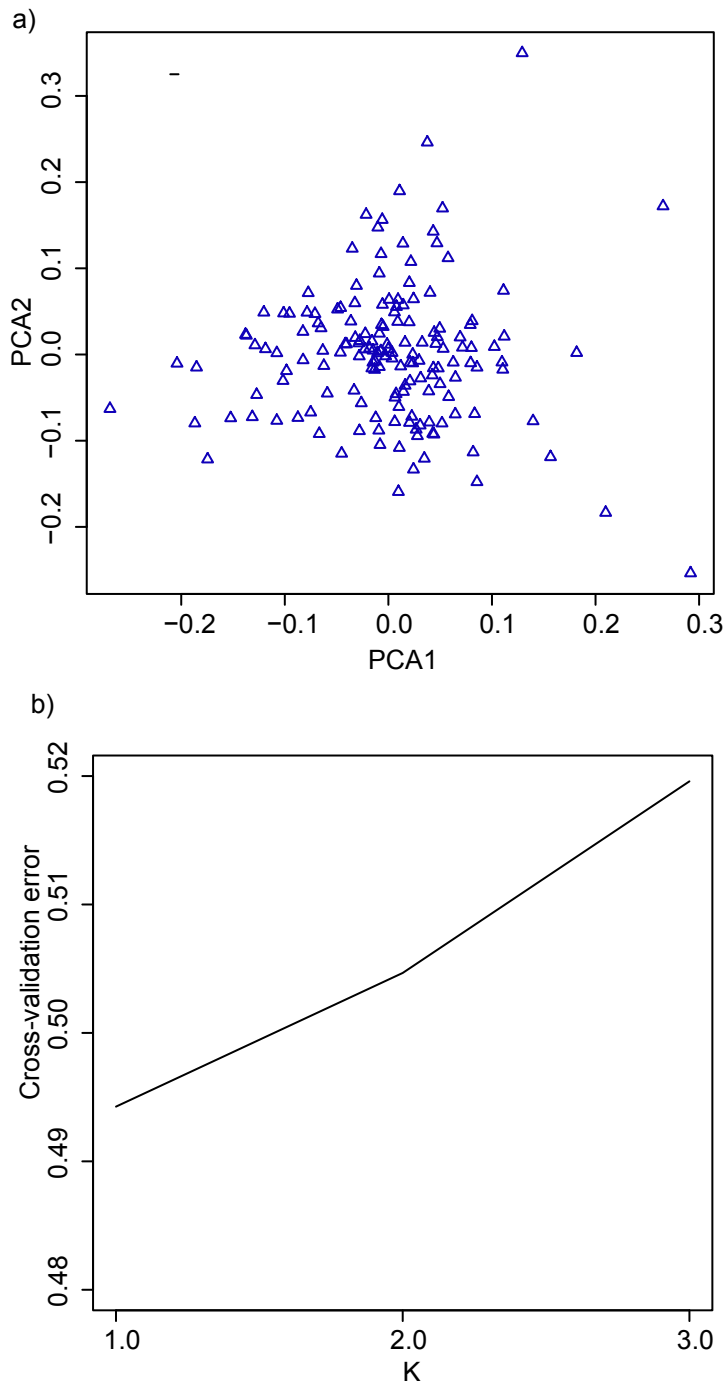

S4 Figure: Analysis of admixture in *D. simulans* a) PCA analysis of the *D. simulans* data does not show evidence of admixture. b) We analyzed the *D. simulans* data using ADMIXTURE, and the possibility of 1, 2, or 3 populations. Cross-validation scores indicate the likelihood of a given number of populations, with the lowest score being the most likely. The lowest cross-validation score indicated that a single population is the most likely scenario.

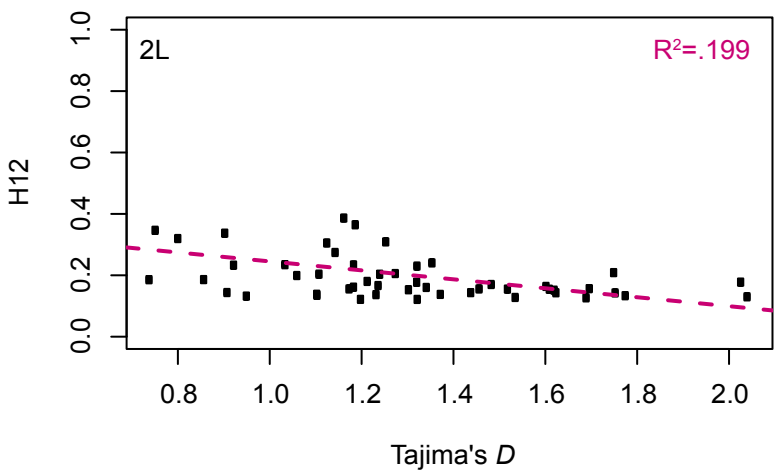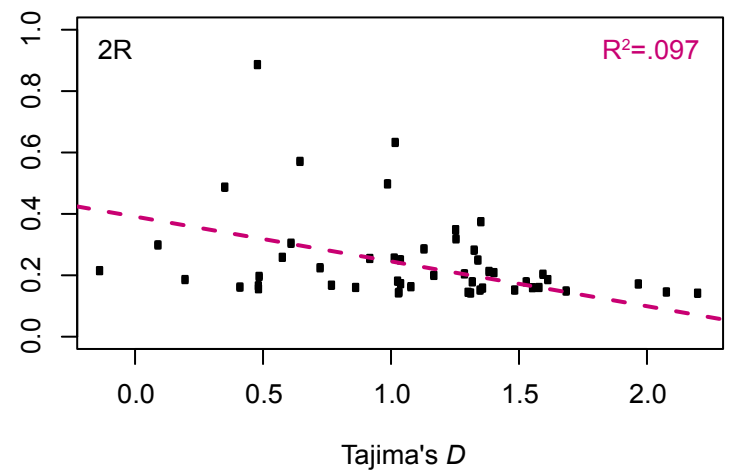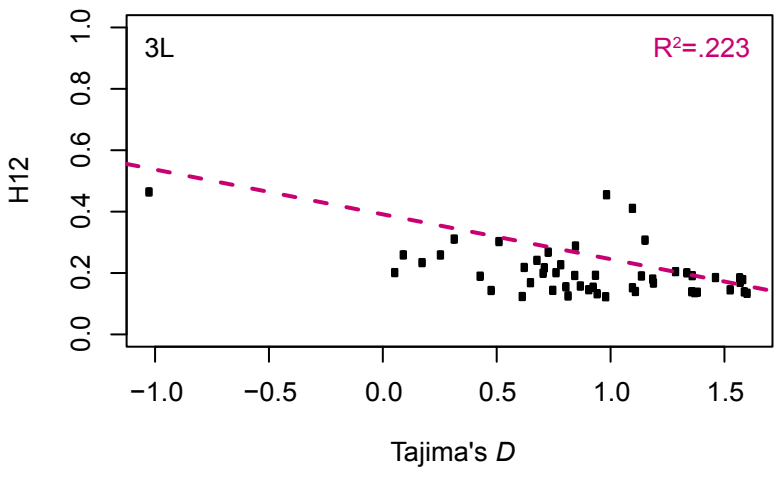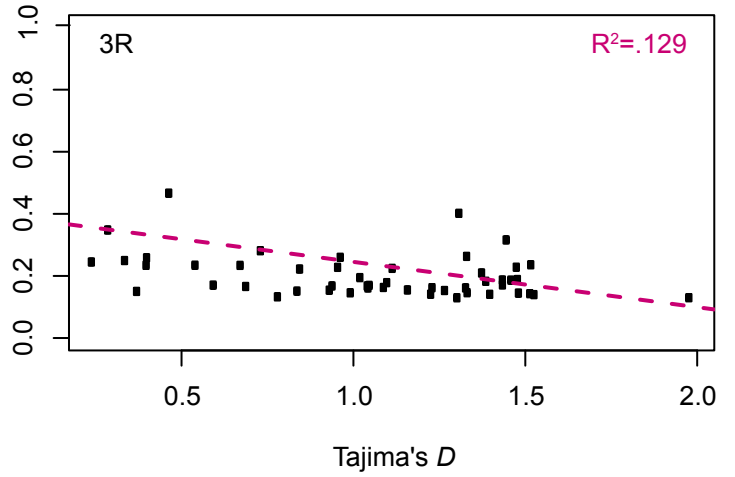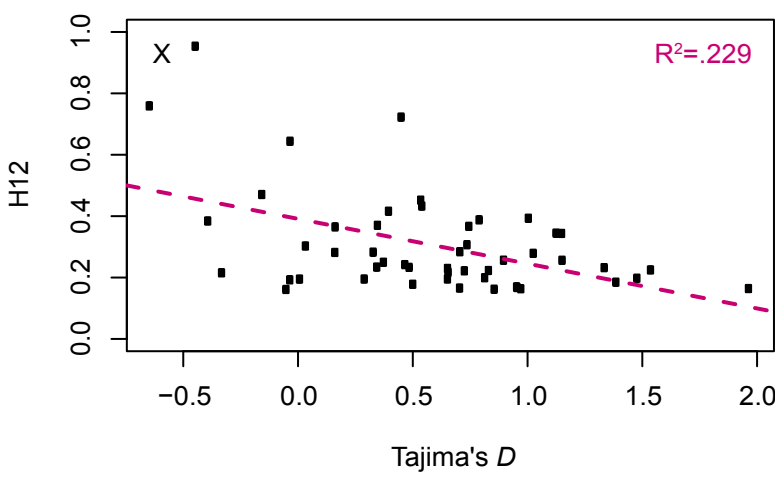

S5 Figure: The top 50 Tajima's  $D$  values from each chromosome against the average Tajima's  $D$  within that window.  $H_{12}$  is less able to detect sweeps as they become softer, so one might expect a slight negative relationship between values of  $H_{12}$  and Tajima's  $D$ , which is what we find ( $p < 0.0001$ ).

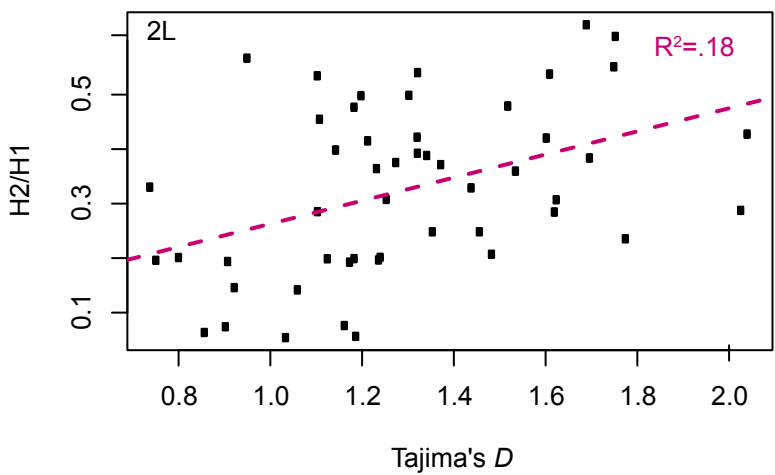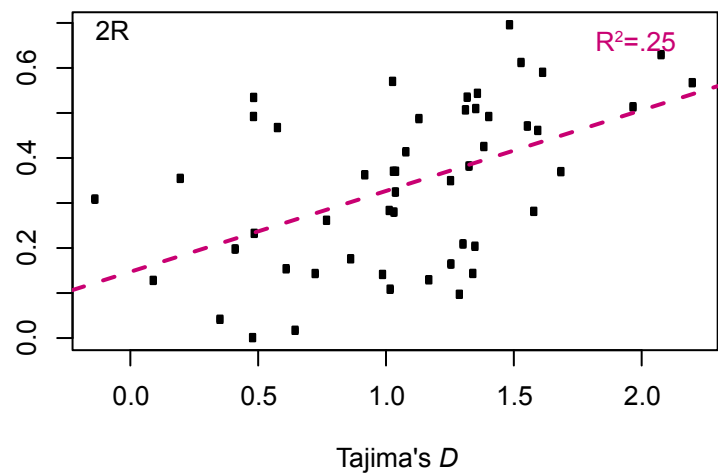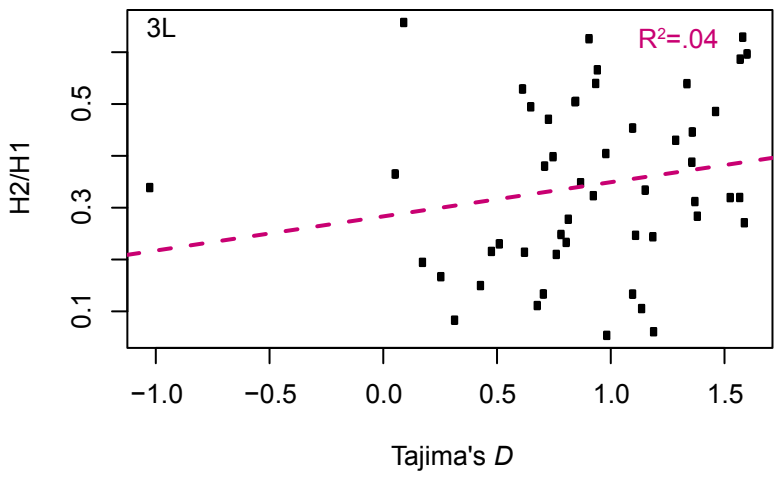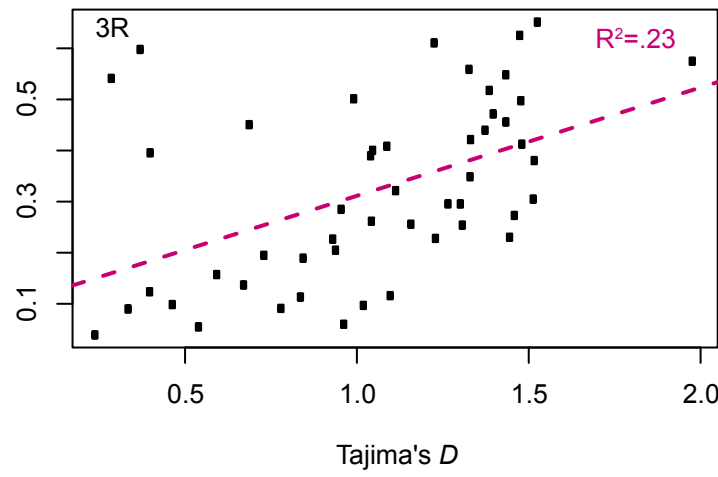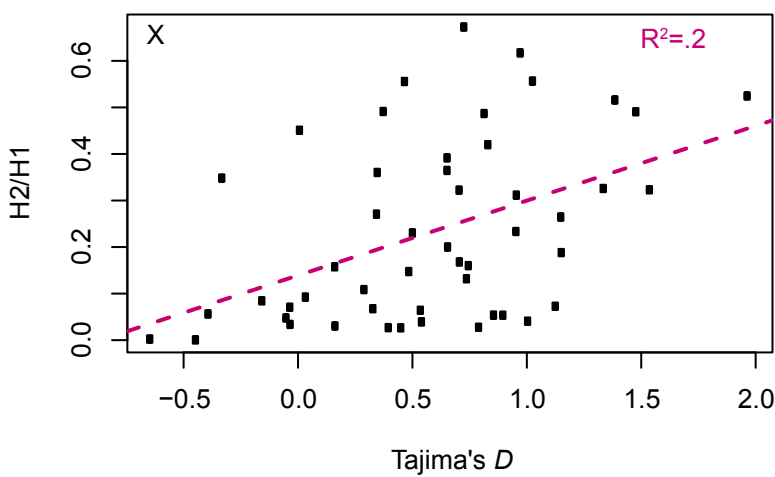

S6 Figure: The  $H2/H1$  values for the top 50  $H12$  intervals plotted against Tajima's  $D$ . The relationship between  $H2/H1$  and Tajima's  $D$  is positive as expected on all of the autosomes and the  $X$ , except for  $3L$  ( $p < 0.0003-0.002$ ,  $3L p < .148$ ).

***Cyp6g1***

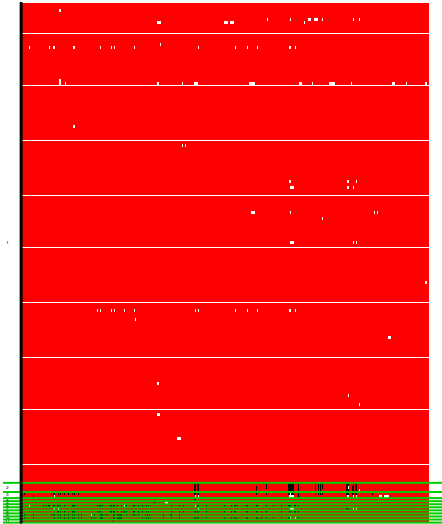

**2L, 3167364**

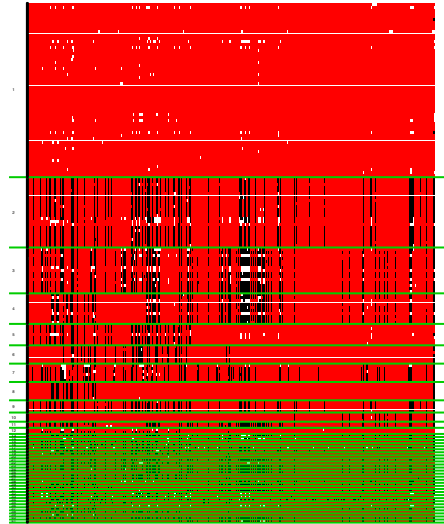

**3L, 2402968**

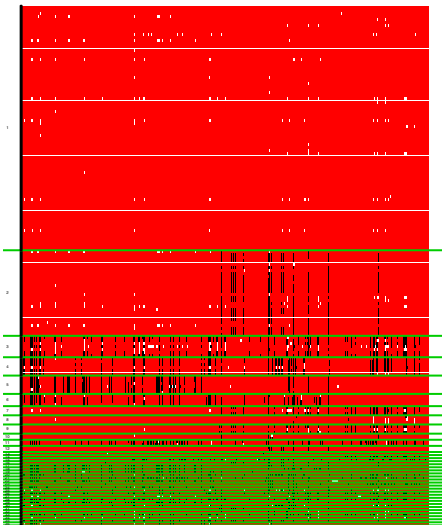

S7 Figure: Examples of haplotypes at the top 50 H12 intervals. Red indicates matching sequences, black indicates a variant, and green lines separate haplotype groups. The first interval contains *Cyp6g1* and likely represents a hard sweep, while the other two intervals demonstrate the types of patterns that are contributing to high H2/H1 and Tajima's *D*.

S1 Table: Top 50 H12 intervals from each chromosome

| Chromosome | Center of analysis window | Left coord of analysis window | Right coordinate of analysis window | K (number of unique haplotypes) | H1      | H2       | H12      | H2/H1   | Smallest edge of peak | Largest edge of peak |
|------------|---------------------------|-------------------------------|-------------------------------------|---------------------------------|---------|----------|----------|---------|-----------------------|----------------------|
| 2L         | 5715684                   | 5702965                       | 5728008                             | 46                              | 0.26429 | 0.020138 | 0.386367 | 0.0762  | 5684290               | 5824679              |
| 2L         | 12553101                  | 12546731                      | 12559594                            | 31                              | 0.29045 | 0.016367 | 0.36436  | 0.05635 | 12233492              | 12652031             |
| 2L         | 8784901                   | 8774197                       | 8792836                             | 36                              | 0.21087 | 0.041315 | 0.346505 | 0.19593 | 8719916               | 8846952              |
| 2L         | 12141969                  | 12131405                      | 12153660                            | 54                              | 0.23322 | 0.017266 | 0.337093 | 0.07404 | 12064246              | 12179758             |
| 2L         | 18597719                  | 18586979                      | 18615336                            | 41                              | 0.19439 | 0.039066 | 0.319585 | 0.20096 | 18416371              | 18654559             |
| 2L         | 2852348                   | 2838054                       | 2870840                             | 44                              | 0.17398 | 0.053529 | 0.30872  | 0.30768 | 2799407               | 2964769              |
| 2L         | 17803566                  | 17787909                      | 17821044                            | 59                              | 0.07197 | 0.044844 | 0.120415 | 0.62308 | 17699702              | 17852758             |
| 2L         | 18079723                  | 18068252                      | 18089142                            | 38                              | 0.1555  | 0.061938 | 0.274256 | 0.39831 | 17852758              | 18298374             |
| 2L         | 3167364                   | 3154749                       | 3176289                             | 41                              | 0.14955 | 0.037128 | 0.240277 | 0.24826 | 2964769               | 3206011              |
| 2L         | 3656662                   | 3648148                       | 3668444                             | 66                              | 0.18962 | 0.010242 | 0.234464 | 0.05401 | 3544599               | 3704863              |
| 2L         | 13181507                  | 13171170                      | 13193360                            | 53                              | 0.14533 | 0.028927 | 0.233633 | 0.19905 | 12939209              | 13353983             |
| 2L         | 6382832                   | 6370229                       | 6392432                             | 54                              | 0.15571 | 0.022699 | 0.232941 | 0.14578 | 6339665               | 6476889              |
| 2L         | 8980958                   | 8971196                       | 8994247                             | 49                              | 0.12581 | 0.049377 | 0.229896 | 0.39246 | 8948746               | 9089535              |
| 2L         | 1471450                   | 1457736                       | 1485852                             | 49                              | 0.11128 | 0.061315 | 0.208581 | 0.551   | 1387552               | 1593592              |
| 2L         | 19025301                  | 19012188                      | 19049868                            | 58                              | 0.11218 | 0.042111 | 0.205606 | 0.37539 | 19008092              | 19100525             |
| 2L         | 19238308                  | 19230165                      | 19252766                            | 45                              | 0.11737 | 0.053391 | 0.203668 | 0.45489 | 19206122              | 19286170             |
| 2L         | 18367277                  | 18354477                      | 18377647                            | 52                              | 0.13107 | 0.026401 | 0.203391 | 0.20143 | 18298374              | 18416371             |
| 2L         | 16398843                  | 16387865                      | 16410496                            | 55                              | 0.14512 | 0.020554 | 0.1991   | 0.14163 | 16364069              | 16544725             |
| 2L         | 4746215                   | 4734055                       | 4758626                             | 72                              | 0.14664 | 0.009308 | 0.185882 | 0.06347 | 4713669               | 4825072              |
| 2L         | 2040509                   | 2029925                       | 2050741                             | 36                              | 0.11903 | 0.039308 | 0.185467 | 0.33023 | 1826250               | 2082136              |
| 2L         | 6268980                   | 6250762                       | 6282753                             | 54                              | 0.10436 | 0.043322 | 0.179931 | 0.41512 | 6223729               | 6300629              |
| 2L         | 19504225                  | 19493875                      | 19517711                            | 50                              | 0.11661 | 0.033529 | 0.177647 | 0.28754 | 19376469              | 19579363             |
| 2L         | 8474864                   | 8458332                       | 8487400                             | 57                              | 0.10062 | 0.042457 | 0.177232 | 0.42194 | 8438454               | 8524225              |
| 2L         | 7236899                   | 7227627                       | 7249972                             | 59                              | 0.11349 | 0.023495 | 0.169965 | 0.20701 | 7199239               | 7267799              |
| 2L         | 12813874                  | 12800414                      | 12825279                            | 59                              | 0.10768 | 0.021176 | 0.166505 | 0.19666 | 12773309              | 12845466             |
| 2L         | 11533001                  | 11518273                      | 11547101                            | 61                              | 0.0908  | 0.038166 | 0.163668 | 0.42035 | 11490873              | 11622291             |



|    |          |          |          |    |         |          |          |         |          |          |
|----|----------|----------|----------|----|---------|----------|----------|---------|----------|----------|
| 2L | 17659157 | 17649756 | 17667726 | 47 | 0.0955  | 0.045536 | 0.161246 | 0.47681 | 17623766 | 17689641 |
| 2L | 4236401  | 4224356  | 4252448  | 57 | 0.09509 | 0.03692  | 0.160346 | 0.38828 | 4161528  | 4457322  |
| 2L | 16255367 | 16242358 | 16268542 | 62 | 0.08983 | 0.034464 | 0.156263 | 0.38367 | 16216021 | 16280365 |
| 2L | 15234056 | 15223811 | 15246972 | 58 | 0.10713 | 0.020623 | 0.155571 | 0.19251 | 15175535 | 15318669 |
| 2L | 5435005  | 5411962  | 5450185  | 75 | 0.09322 | 0.023149 | 0.155502 | 0.24833 | 5389995  | 5480753  |
| 2L | 7449149  | 7441634  | 7457499  | 46 | 0.09093 | 0.043564 | 0.154948 | 0.47907 | 7388682  | 7499035  |
| 2L | 10112047 | 10096687 | 10122294 | 75 | 0.08152 | 0.043841 | 0.154602 | 0.53778 | 10055975 | 10147147 |
| 2L | 3972456  | 3947205  | 3986933  | 81 | 0.07979 | 0.039792 | 0.152734 | 0.4987  | 3931371  | 4038620  |
| 2L | 12867994 | 12855532 | 12881211 | 63 | 0.09363 | 0.026644 | 0.151488 | 0.28455 | 12845466 | 12918541 |
| 2L | 17215439 | 17190873 | 17237346 | 58 | 0.10304 | 0.019965 | 0.143737 | 0.19375 | 17055657 | 17309421 |
| 2L | 12019962 | 12002037 | 12029131 | 72 | 0.08249 | 0.027128 | 0.143391 | 0.32886 | 11982553 | 12064246 |
| 2L | 16880853 | 16859832 | 16899560 | 62 | 0.09232 | 0.028339 | 0.142907 | 0.30697 | 16785625 | 16931395 |
| 2L | 5575847  | 5563832  | 5586778  | 47 | 0.08457 | 0.051315 | 0.142491 | 0.60679 | 5521248  | 5676762  |
| 2L | 7797411  | 7783655  | 7813071  | 63 | 0.07612 | 0.040692 | 0.138131 | 0.53455 | 7764405  | 7825439  |
| 2L | 16336415 | 16326789 | 16346696 | 58 | 0.08374 | 0.031107 | 0.137716 | 0.37149 | 16280365 | 16364069 |
| 2L | 6559090  | 6549595  | 6568315  | 48 | 0.09149 | 0.033322 | 0.136886 | 0.36422 | 6532988  | 6609546  |
| 2L | 20117535 | 20103071 | 20132119 | 54 | 0.0854  | 0.02436  | 0.13481  | 0.28525 | 19935088 | 20170605 |
| 2L | 9112342  | 9100851  | 9127544  | 65 | 0.08761 | 0.020623 | 0.133287 | 0.23539 | 9089535  | 9130337  |
| 2L | 2450661  | 2439282  | 2468978  | 62 | 0.0719  | 0.040761 | 0.132111 | 0.56689 | 2416201  | 2482983  |
| 2L | 10798516 | 10783017 | 10807885 | 71 | 0.07405 | 0.031661 | 0.129758 | 0.42757 | 10740786 | 10811629 |
| 2L | 10009151 | 9996295  | 10022387 | 70 | 0.07398 | 0.026609 | 0.127751 | 0.35968 | 9926135  | 10032937 |
| 2L | 14300093 | 14292809 | 14313834 | 54 | 0.07827 | 0.04917  | 0.126436 | 0.62821 | 14274675 | 14375274 |
| 2L | 13369152 | 13358769 | 13382363 | 58 | 0.07059 | 0.035156 | 0.121522 | 0.49804 | 13353983 | 13387452 |
| 2L | 2117513  | 2107096  | 2127700  | 43 | 0.07709 | 0.041661 | 0.121384 | 0.54039 | 2082136  | 2229343  |
| 2R | 8764552  | 8750679  | 8778836  | 11 | 0.85363 | 0.000727 | 0.886228 | 0.00085 | 8244458  | 9143889  |
| 2R | 12051019 | 12045589 | 12057151 | 14 | 0.41176 | 0.044671 | 0.632734 | 0.10849 | 11635182 | 12134646 |
| 2R | 6549687  | 6539954  | 6559273  | 26 | 0.48194 | 0.00827  | 0.571003 | 0.01716 | 6375756  | 6682903  |
| 2R | 15982722 | 15971416 | 15993058 | 30 | 0.30498 | 0.04308  | 0.497647 | 0.14125 | 15915765 | 16078561 |
| 2R | 3420073  | 3407177  | 3430697  | 28 | 0.3683  | 0.015329 | 0.487128 | 0.04162 | 3267955  | 3671676  |
| 2R | 5133485  | 5120764  | 5144841  | 42 | 0.19087 | 0.097301 | 0.374394 | 0.50979 | 4954683  | 5212698  |
| 2R | 3184491  | 3171907  | 3193434  | 41 | 0.18519 | 0.06474  | 0.348512 | 0.34959 | 2895217  | 3214645  |

|    |          |          |          |    |         |          |          |         |          |          |
|----|----------|----------|----------|----|---------|----------|----------|---------|----------|----------|
| 2R | 13426402 | 13416796 | 13436810 | 50 | 0.19149 | 0.031488 | 0.318547 | 0.16444 | 13343665 | 13485768 |
| 2R | 16397900 | 16382977 | 16410972 | 45 | 0.19467 | 0.029931 | 0.304498 | 0.15375 | 16269955 | 16561452 |
| 2R | 13850048 | 13836088 | 13867399 | 56 | 0.18893 | 0.024187 | 0.298754 | 0.12802 | 13809854 | 13886966 |
| 2R | 10758703 | 10744527 | 10775465 | 45 | 0.14913 | 0.072699 | 0.285744 | 0.48747 | 10702980 | 10787689 |
| 2R | 14109892 | 14099210 | 14117048 | 32 | 0.1573  | 0.060104 | 0.282007 | 0.38209 | 14047490 | 14141383 |
| 2R | 7352962  | 7342903  | 7363212  | 39 | 0.13751 | 0.064291 | 0.258478 | 0.46754 | 7316351  | 7427196  |
| 2R | 5416967  | 5405406  | 5424693  | 42 | 0.15142 | 0.042907 | 0.256055 | 0.28336 | 5357627  | 5491186  |
| 2R | 11200163 | 11193571 | 11208496 | 39 | 0.14678 | 0.053218 | 0.25474  | 0.36256 | 11166287 | 11237080 |
| 2R | 18753783 | 18741625 | 18761899 | 53 | 0.13848 | 0.044913 | 0.250035 | 0.32434 | 18673036 | 18810963 |
| 2R | 8041480  | 8032267  | 8058751  | 48 | 0.16547 | 0.023737 | 0.249619 | 0.14345 | 7997205  | 8091445  |
| 2R | 17917544 | 17905973 | 17928588 | 67 | 0.1454  | 0.02083  | 0.224291 | 0.14327 | 17842402 | 17969104 |
| 2R | 9831899  | 9823362  | 9844915  | 52 | 0.12512 | 0.038616 | 0.215087 | 0.30863 | 9800878  | 9858132  |
| 2R | 18362391 | 18348373 | 18377655 | 64 | 0.11135 | 0.04737  | 0.212526 | 0.42542 | 18304597 | 18428004 |
| 2R | 13752022 | 13737253 | 13768350 | 60 | 0.109   | 0.053633 | 0.208651 | 0.49206 | 13696413 | 13809854 |
| 2R | 19130215 | 19123615 | 19143533 | 54 | 0.15211 | 0.014775 | 0.204429 | 0.09713 | 19061900 | 19170737 |
| 2R | 4645671  | 4634009  | 4657765  | 49 | 0.11329 | 0.052249 | 0.203391 | 0.46121 | 4612619  | 4713702  |
| 2R | 13200835 | 13181881 | 13218631 | 58 | 0.13834 | 0.017889 | 0.199585 | 0.12931 | 13138379 | 13284388 |
| 2R | 6702506  | 6695298  | 6714512  | 46 | 0.12664 | 0.029446 | 0.196332 | 0.23251 | 6682903  | 6763693  |
| 2R | 13908686 | 13898082 | 13923957 | 60 | 0.10381 | 0.036817 | 0.186021 | 0.35467 | 13886966 | 13947103 |
| 2R | 2616989  | 2603664  | 2631944  | 45 | 0.10346 | 0.061073 | 0.185813 | 0.5903  | 2555528  | 2676414  |
| 2R | 5790564  | 5779471  | 5802979  | 56 | 0.09862 | 0.056228 | 0.180969 | 0.57018 | 5763528  | 5848565  |
| 2R | 2462272  | 2442614  | 2489883  | 43 | 0.10747 | 0.057509 | 0.178478 | 0.53509 | 2395682  | 2555528  |
| 2R | 13602979 | 13590330 | 13614442 | 49 | 0.10311 | 0.063114 | 0.178408 | 0.61208 | 13544678 | 13647895 |
| 2R | 19941528 | 19923660 | 19958253 | 62 | 0.09696 | 0.035917 | 0.172526 | 0.37045 | 19879401 | 19987313 |
| 2R | 9219538  | 9210865  | 9232670  | 50 | 0.09737 | 0.05     | 0.171626 | 0.5135  | 9193087  | 9261930  |
| 2R | 5633895  | 5621457  | 5651000  | 51 | 0.10796 | 0.028235 | 0.167751 | 0.26154 | 5591113  | 5679115  |
| 2R | 9779992  | 9766999  | 9793249  | 62 | 0.0883  | 0.04346  | 0.165536 | 0.49216 | 9743389  | 9800878  |
| 2R | 15164270 | 15154393 | 15178625 | 62 | 0.08976 | 0.037128 | 0.16263  | 0.41365 | 15142289 | 15184481 |
| 2R | 10560261 | 10549691 | 10572685 | 55 | 0.11218 | 0.02218  | 0.161592 | 0.19772 | 10535619 | 10621216 |
| 2R | 12565078 | 12550023 | 12580286 | 68 | 0.10498 | 0.018478 | 0.160346 | 0.17601 | 12504677 | 12624448 |
| 2R | 14462472 | 14452956 | 14477125 | 74 | 0.09322 | 0.026228 | 0.160208 | 0.28137 | 14440538 | 14498688 |

|    |          |          |          |    |         |          |          |         |          |          |
|----|----------|----------|----------|----|---------|----------|----------|---------|----------|----------|
| 2R | 11348543 | 11330617 | 11364062 | 69 | 0.08478 | 0.039931 | 0.159516 | 0.47102 | 11317417 | 11380475 |
| 2R | 19342735 | 19329787 | 19357648 | 48 | 0.09287 | 0.050484 | 0.15827  | 0.54359 | 19283438 | 19381149 |
| 2R | 2032646  | 2019861  | 2047529  | 40 | 0.09633 | 0.051488 | 0.156125 | 0.53448 | 1961777  | 2326472  |
| 2R | 2799547  | 2783653  | 2815166  | 45 | 0.09571 | 0.066609 | 0.151903 | 0.69595 | 2676414  | 2849060  |
| 2R | 13966475 | 13952508 | 13978862 | 57 | 0.10436 | 0.02128  | 0.151834 | 0.20391 | 13947103 | 14011602 |
| 2R | 18530412 | 18511230 | 18542709 | 71 | 0.08782 | 0.032457 | 0.14872  | 0.36958 | 18458803 | 18565076 |
| 2R | 11444485 | 11432007 | 11464637 | 52 | 0.08976 | 0.056505 | 0.145536 | 0.62953 | 11395843 | 11488007 |
| 2R | 15427750 | 15415684 | 15442420 | 64 | 0.09301 | 0.026021 | 0.144775 | 0.27976 | 15350522 | 15480374 |
| 2R | 6904748  | 6885287  | 6930610  | 81 | 0.08858 | 0.018512 | 0.144637 | 0.20898 | 6862044  | 6947365  |
| 2R | 5238712  | 5222743  | 5250827  | 68 | 0.07938 | 0.029412 | 0.142491 | 0.37053 | 5212698  | 5269171  |
| 2R | 18231310 | 18221126 | 18245350 | 61 | 0.08111 | 0.041107 | 0.142284 | 0.50683 | 18182633 | 18273402 |
| 2R | 4920641  | 4901557  | 4937499  | 53 | 0.08187 | 0.046436 | 0.141661 | 0.5672  | 4881459  | 4954683  |
| 3L | 17880791 | 17868122 | 17891769 | 26 | 0.24913 | 0.084394 | 0.464014 | 0.33875 | 17795843 | 17897526 |
| 3L | 5434042  | 5426263  | 5440111  | 34 | 0.32997 | 0.017682 | 0.454879 | 0.05359 | 5117946  | 5703687  |
| 3L | 2402968  | 2393102  | 2413650  | 36 | 0.2555  | 0.034048 | 0.410519 | 0.13326 | 2305797  | 2531889  |
| 3L | 16197125 | 16182417 | 16209496 | 40 | 0.22955 | 0.019031 | 0.310519 | 0.08291 | 16157093 | 16225191 |
| 3L | 19387583 | 19381016 | 19395137 | 28 | 0.17474 | 0.058339 | 0.307197 | 0.33386 | 19353005 | 19510780 |
| 3L | 21033010 | 21022339 | 21041571 | 25 | 0.1899  | 0.043702 | 0.302353 | 0.23014 | 20964768 | 21162755 |
| 3L | 3086235  | 3038655  | 3105362  | 31 | 0.15446 | 0.078028 | 0.28782  | 0.50515 | 2596686  | 3157231  |
| 3L | 5800028  | 5782097  | 5814200  | 66 | 0.07661 | 0.043356 | 0.132388 | 0.56594 | 5721789  | 5876669  |
| 3L | 13040832 | 13026398 | 13051609 | 42 | 0.14436 | 0.067924 | 0.267958 | 0.47052 | 12940298 | 13092798 |
| 3L | 8088407  | 8078570  | 8100835  | 33 | 0.15356 | 0.100934 | 0.258824 | 0.65728 | 8051592  | 8119553  |
| 3L | 19878135 | 19867814 | 19889254 | 39 | 0.1701  | 0.028374 | 0.258685 | 0.1668  | 19863371 | 19908452 |
| 3L | 22526592 | 22515354 | 22538600 | 42 | 0.18    | 0.02     | 0.241176 | 0.11111 | 22370820 | 22814860 |
| 3L | 21550174 | 21540049 | 21563121 | 32 | 0.16512 | 0.032111 | 0.233772 | 0.19447 | 21369067 | 21623388 |
| 3L | 20840658 | 20832859 | 20853958 | 41 | 0.13924 | 0.034567 | 0.226782 | 0.24826 | 20639818 | 20964768 |
| 3L | 8684350  | 8673194  | 8695695  | 63 | 0.12837 | 0.027474 | 0.218062 | 0.21402 | 8642429  | 8762363  |
| 3L | 4791486  | 4771120  | 4806984  | 51 | 0.11813 | 0.044913 | 0.216817 | 0.3802  | 4648468  | 4913518  |
| 3L | 6072698  | 6060571  | 6082503  | 51 | 0.11225 | 0.04827  | 0.204498 | 0.43002 | 6007091  | 6152579  |
| 3L | 21750488 | 21729092 | 21761434 | 45 | 0.11529 | 0.042076 | 0.201246 | 0.36495 | 21628619 | 21899425 |
| 3L | 7985871  | 7974393  | 7999302  | 47 | 0.13246 | 0.027785 | 0.200969 | 0.20977 | 7952258  | 8038295  |

|    |          |          |          |    |         |          |          |         |          |          |
|----|----------|----------|----------|----|---------|----------|----------|---------|----------|----------|
| 3L | 2047201  | 2030582  | 2062189  | 44 | 0.10844 | 0.058478 | 0.200484 | 0.53925 | 1879308  | 2263590  |
| 3L | 8521008  | 8515828  | 8525314  | 43 | 0.14858 | 0.019827 | 0.199239 | 0.13344 | 8494103  | 8613872  |
| 3L | 2549320  | 2539094  | 2560171  | 60 | 0.0845  | 0.02346  | 0.12519  | 0.27764 | 2531889  | 2596686  |
| 3L | 23114314 | 23062540 | 23130261 | 42 | 0.08    | 0.042318 | 0.123391 | 0.52898 | 22814860 | 23189666 |
| 3L | 21234606 | 21217902 | 21248517 | 33 | 0.11433 | 0.061696 | 0.192595 | 0.53965 | 21162755 | 21369067 |
| 3L | 13745645 | 13737217 | 13756672 | 42 | 0.1117  | 0.056332 | 0.191972 | 0.50434 | 13715467 | 13784507 |
| 3L | 19818924 | 19802906 | 19832726 | 67 | 0.09993 | 0.044567 | 0.19128  | 0.44598 | 19790217 | 19849964 |
| 3L | 15965354 | 15951746 | 15981810 | 74 | 0.1301  | 0.013702 | 0.190311 | 0.10532 | 15918933 | 16003946 |
| 3L | 8863441  | 8853660  | 8872997  | 57 | 0.12761 | 0.0191   | 0.189619 | 0.14967 | 8832932  | 8904668  |
| 3L | 11689081 | 11679851 | 11697260 | 50 | 0.10761 | 0.052249 | 0.185121 | 0.48553 | 11633438 | 11721160 |
| 3L | 18537733 | 18519661 | 18550300 | 57 | 0.10761 | 0.034394 | 0.184014 | 0.31961 | 18394826 | 18648903 |
| 3L | 14347910 | 14342563 | 14358074 | 47 | 0.11439 | 0.027889 | 0.180138 | 0.2438  | 14298615 | 14400892 |
| 3L | 18307832 | 18288730 | 18321343 | 55 | 0.10782 | 0.06782  | 0.178408 | 0.62901 | 18253835 | 18379120 |
| 3L | 3570231  | 3553250  | 3587878  | 63 | 0.07529 | 0.03045  | 0.12263  | 0.40441 | 3504726  | 3625318  |
| 3L | 20561650 | 20545870 | 20574390 | 48 | 0.09675 | 0.056747 | 0.169689 | 0.58655 | 20528000 | 20596042 |
| 3L | 13799468 | 13787483 | 13819607 | 70 | 0.08872 | 0.043875 | 0.168443 | 0.49454 | 13784507 | 13924732 |
| 3L | 13121020 | 13101550 | 13136180 | 70 | 0.14159 | 0.008581 | 0.167336 | 0.06061 | 13092798 | 13177481 |
| 3L | 6290643  | 6274826  | 6306057  | 56 | 0.09363 | 0.032595 | 0.157578 | 0.34812 | 6161728  | 6312155  |
| 3L | 7937085  | 7927233  | 7952258  | 62 | 0.09965 | 0.023218 | 0.154948 | 0.23299 | 7879334  | 7952258  |
| 3L | 5942936  | 5927405  | 5956235  | 48 | 0.09896 | 0.031972 | 0.153772 | 0.32308 | 5895715  | 6007091  |
| 3L | 6524982  | 6507304  | 6538725  | 64 | 0.08208 | 0.037232 | 0.151834 | 0.45363 | 6481271  | 6578628  |
| 3L | 13497559 | 13476658 | 13513176 | 57 | 0.08325 | 0.052111 | 0.145536 | 0.62594 | 13356632 | 13550723 |
| 3L | 19605679 | 19599146 | 19617579 | 67 | 0.08547 | 0.027301 | 0.145052 | 0.31943 | 19580475 | 19724118 |
| 3L | 14028112 | 14016017 | 14042524 | 57 | 0.08304 | 0.03308  | 0.143529 | 0.39833 | 13924732 | 14119024 |
| 3L | 11233764 | 11218494 | 11240860 | 64 | 0.09744 | 0.021003 | 0.142976 | 0.21555 | 11211187 | 11257505 |
| 3L | 12551383 | 12535920 | 12557047 | 65 | 0.09301 | 0.022941 | 0.139723 | 0.24665 | 12531574 | 12579497 |
| 3L | 3795427  | 3780377  | 3807380  | 70 | 0.07737 | 0.03     | 0.138824 | 0.38775 | 3757613  | 3839807  |
| 3L | 14657993 | 14640090 | 14675453 | 66 | 0.08775 | 0.023772 | 0.138339 | 0.2709  | 14588423 | 14710505 |
| 3L | 18933810 | 18915051 | 18950789 | 63 | 0.08519 | 0.024152 | 0.137509 | 0.28351 | 18769139 | 19015214 |
| 3L | 15692199 | 15678527 | 15704741 | 81 | 0.07647 | 0.023841 | 0.135848 | 0.31176 | 15648823 | 15750543 |
| 3L | 3218876  | 3208287  | 3233623  | 49 | 0.08242 | 0.04917  | 0.13391  | 0.59656 | 3191167  | 3265719  |

|    |          |          |          |    |         |          |          |         |          |          |
|----|----------|----------|----------|----|---------|----------|----------|---------|----------|----------|
| 3R | 20797651 | 20788331 | 20807933 | 31 | 0.31087 | 0.030588 | 0.466574 | 0.0984  | 20740195 | 20824681 |
| 3R | 4663252  | 4656186  | 4674057  | 36 | 0.22727 | 0.057716 | 0.401661 | 0.25396 | 4132400  | 4829526  |
| 3R | 11771449 | 11759704 | 11785814 | 29 | 0.19612 | 0.106125 | 0.347889 | 0.54111 | 11721408 | 11826522 |
| 3R | 12199166 | 12185379 | 12221130 | 31 | 0.1899  | 0.043702 | 0.315848 | 0.23014 | 11826522 | 12290187 |
| 3R | 4888469  | 4878559  | 4906323  | 49 | 0.16519 | 0.03218  | 0.281038 | 0.19481 | 4829526  | 5066383  |
| 3R | 12554231 | 12542441 | 12573535 | 39 | 0.1492  | 0.052007 | 0.262907 | 0.34856 | 12347445 | 12948188 |
| 3R | 20450937 | 20442668 | 20457866 | 50 | 0.2126  | 0.012734 | 0.259931 | 0.0599  | 20424866 | 20511098 |
| 3R | 1921089  | 1908501  | 1936133  | 39 | 0.14886 | 0.058858 | 0.25827  | 0.3954  | 1621734  | 2061294  |
| 3R | 17875614 | 17868272 | 17887720 | 63 | 0.17066 | 0.015329 | 0.249481 | 0.08982 | 17835586 | 17932293 |
| 3R | 19149086 | 19134827 | 19162488 | 64 | 0.20796 | 0.008097 | 0.244775 | 0.03894 | 19102766 | 19206851 |
| 3R | 14917026 | 14908813 | 14926009 | 43 | 0.13405 | 0.050969 | 0.235779 | 0.38023 | 14888842 | 14970039 |
| 3R | 6858354  | 6849274  | 6867655  | 57 | 0.18976 | 0.010381 | 0.234602 | 0.0547  | 6779619  | 6902456  |
| 3R | 2354980  | 2343854  | 2365467  | 40 | 0.16678 | 0.020588 | 0.234256 | 0.12344 | 2176625  | 2675390  |
| 3R | 1300245  | 1289747  | 1314811  | 36 | 0.1746  | 0.023875 | 0.233979 | 0.13674 | 1246906  | 1335742  |
| 3R | 14092775 | 14084743 | 14101177 | 51 | 0.08187 | 0.037024 | 0.129204 | 0.45224 | 14071094 | 14154838 |
| 3R | 20895661 | 20883013 | 20903542 | 53 | 0.13592 | 0.03872  | 0.227612 | 0.28488 | 20855336 | 20972010 |
| 3R | 22254034 | 22244720 | 22265342 | 46 | 0.12747 | 0.040969 | 0.22436  | 0.32139 | 22211744 | 22335100 |
| 3R | 3498663  | 3486932  | 3506971  | 32 | 0.15882 | 0.030069 | 0.222145 | 0.18932 | 3460508  | 3517105  |
| 3R | 25651788 | 25636554 | 25659736 | 45 | 0.11419 | 0.050208 | 0.209412 | 0.4397  | 25500924 | 25872652 |
| 3R | 10374814 | 10360795 | 10393813 | 65 | 0.14727 | 0.014256 | 0.194464 | 0.0968  | 10295528 | 10428875 |
| 3R | 21466404 | 21456393 | 21476357 | 46 | 0.10471 | 0.052076 | 0.188374 | 0.49736 | 21391289 | 21510147 |
| 3R | 20601915 | 20585719 | 20614744 | 47 | 0.10484 | 0.057474 | 0.186782 | 0.54818 | 20523300 | 20705070 |
| 3R | 9896631  | 9887730  | 9911733  | 71 | 0.10512 | 0.028685 | 0.186436 | 0.27288 | 9823543  | 9923827  |
| 3R | 21116742 | 21105345 | 21129568 | 59 | 0.0982  | 0.05083  | 0.182699 | 0.51762 | 20972010 | 21193577 |
| 3R | 8255699  | 8243360  | 8268236  | 56 | 0.1409  | 0.016332 | 0.17827  | 0.11591 | 8163861  | 8330889  |
| 3R | 22181236 | 22161828 | 22189602 | 67 | 0.07689 | 0.02692  | 0.129481 | 0.35014 | 22120465 | 22208033 |
| 3R | 6514114  | 6503339  | 6533365  | 81 | 0.10678 | 0.016782 | 0.170311 | 0.15716 | 6468819  | 6545835  |
| 3R | 8960377  | 8947861  | 8970754  | 37 | 0.1117  | 0.044706 | 0.16955  | 0.40025 | 8916989  | 9007635  |
| 3R | 5308886  | 5296020  | 5327093  | 42 | 0.10976 | 0.042768 | 0.167612 | 0.38966 | 5254290  | 5347148  |
| 3R | 22374630 | 22367891 | 22382738 | 57 | 0.10879 | 0.022284 | 0.167612 | 0.20483 | 22335100 | 22415929 |
| 3R | 26698040 | 26686133 | 26710419 | 49 | 0.09578 | 0.043149 | 0.165952 | 0.45051 | 26649729 | 26751569 |

|    |          |          |          |    |         |          |          |         |          |          |
|----|----------|----------|----------|----|---------|----------|----------|---------|----------|----------|
| 3R | 3647746  | 3633207  | 3657537  | 54 | 0.09356 | 0.038201 | 0.162768 | 0.40828 | 3604199  | 3678282  |
| 3R | 20201069 | 20190613 | 20214301 | 63 | 0.10761 | 0.024533 | 0.161869 | 0.22797 | 20182422 | 20305122 |
| 3R | 21526692 | 21513742 | 21537833 | 50 | 0.09066 | 0.050657 | 0.161246 | 0.55878 | 21510147 | 21751226 |
| 3R | 3745715  | 3728852  | 3759232  | 51 | 0.10796 | 0.028235 | 0.161107 | 0.26154 | 3678282  | 3793844  |
| 3R | 8657766  | 8638105  | 8675171  | 55 | 0.1027  | 0.026263 | 0.15474  | 0.25573 | 8473955  | 8753039  |
| 3R | 25380330 | 25370888 | 25392492 | 59 | 0.09882 | 0.022388 | 0.154118 | 0.22654 | 25247809 | 25425523 |
| 3R | 26229307 | 26216317 | 26240387 | 50 | 0.09509 | 0.028097 | 0.152941 | 0.29549 | 26176452 | 26293290 |
| 3R | 22792166 | 22771528 | 22803035 | 74 | 0.11377 | 0.012872 | 0.151142 | 0.11314 | 22716207 | 22836676 |
| 3R | 23701731 | 23686922 | 23721942 | 40 | 0.0881  | 0.052664 | 0.150104 | 0.5978  | 23597961 | 23755661 |
| 3R | 21859017 | 21842885 | 21878509 | 63 | 0.08187 | 0.034498 | 0.145882 | 0.42139 | 21756403 | 21945847 |
| 3R | 13846136 | 13829664 | 13865116 | 56 | 0.08498 | 0.042595 | 0.145536 | 0.50122 | 13808280 | 13909244 |
| 3R | 8397327  | 8380161  | 8413154  | 72 | 0.08062 | 0.033253 | 0.144637 | 0.41245 | 8356022  | 8420113  |
| 3R | 6016793  | 6003655  | 6031161  | 61 | 0.09204 | 0.028062 | 0.14263  | 0.30489 | 5914799  | 6061213  |
| 3R | 3990828  | 3978074  | 4005098  | 40 | 0.0854  | 0.052145 | 0.141176 | 0.61062 | 3908338  | 4059834  |
| 3R | 17479104 | 17464306 | 17487216 | 59 | 0.08021 | 0.03782  | 0.140761 | 0.47153 | 17413546 | 17503253 |
| 3R | 13043089 | 13029473 | 13050742 | 58 | 0.08346 | 0.05436  | 0.139654 | 0.65133 | 13017371 | 13213609 |
| 3R | 6683065  | 6669149  | 6700556  | 79 | 0.10692 | 0.009723 | 0.132595 | 0.09094 | 6640922  | 6706576  |
| 3R | 5837291  | 5822079  | 5852278  | 53 | 0.0782  | 0.044948 | 0.129689 | 0.57478 | 5802246  | 5868885  |
| 3R | 3094997  | 3078198  | 3103992  | 46 | 0.0908  | 0.026817 | 0.129481 | 0.29535 | 3028496  | 3198525  |
| X  | 9039414  | 9031778  | 9060615  | 6  | 0.91979 | 0.00045  | 0.953633 | 0.00049 | 8940636  | 9340687  |
| X  | 1876458  | 1862029  | 1895307  | 20 | 0.71917 | 0.001661 | 0.759031 | 0.00231 | 1801286  | 2041156  |
| X  | 16252196 | 16239738 | 16261660 | 11 | 0.57322 | 0.015121 | 0.72263  | 0.02638 | 16171148 | 16737799 |
| X  | 8686163  | 8668681  | 8703717  | 20 | 0.49024 | 0.016574 | 0.644083 | 0.03381 | 8579414  | 8904670  |
| X  | 10613508 | 10603054 | 10624579 | 34 | 0.31294 | 0.026401 | 0.470381 | 0.08437 | 10529728 | 10668004 |
| X  | 12456893 | 12446520 | 12462787 | 33 | 0.3337  | 0.021419 | 0.452042 | 0.06418 | 12418220 | 12511077 |
| X  | 5723963  | 5711098  | 5732556  | 33 | 0.33882 | 0.013253 | 0.432803 | 0.03911 | 5673600  | 5910382  |
| X  | 10434971 | 10419411 | 10442244 | 41 | 0.34145 | 0.009135 | 0.416055 | 0.02675 | 10330673 | 10512902 |
| X  | 13872427 | 13862095 | 13886674 | 44 | 0.29869 | 0.012145 | 0.393149 | 0.04066 | 13829980 | 13923389 |
| X  | 16931083 | 16920619 | 16945377 | 41 | 0.32796 | 0.009066 | 0.387751 | 0.02764 | 16819710 | 17062630 |
| X  | 9780038  | 9770137  | 9791685  | 39 | 0.29696 | 0.016678 | 0.384152 | 0.05616 | 9713309  | 9876416  |
| X  | 14168598 | 14159771 | 14180606 | 34 | 0.20125 | 0.072491 | 0.370104 | 0.36021 | 14128149 | 14435996 |

|   |          |          |          |    |         |          |          |         |          |          |
|---|----------|----------|----------|----|---------|----------|----------|---------|----------|----------|
| X | 7205863  | 7190859  | 7216021  | 31 | 0.24422 | 0.039066 | 0.366782 | 0.15996 | 6780756  | 7305406  |
| X | 12667607 | 12649142 | 12679077 | 49 | 0.2955  | 0.008962 | 0.364775 | 0.03033 | 12585244 | 12720462 |
| X | 16109979 | 16102172 | 16119394 | 38 | 0.26332 | 0.01917  | 0.344706 | 0.0728  | 16029032 | 16171148 |
| X | 8160781  | 8148294  | 8179721  | 58 | 0.18671 | 0.049377 | 0.343668 | 0.26446 | 8127920  | 8201918  |
| X | 17612481 | 17597967 | 17623266 | 45 | 0.19529 | 0.025744 | 0.306713 | 0.13182 | 17522499 | 17746228 |
| X | 7884795  | 7876710  | 7895667  | 50 | 0.21446 | 0.019827 | 0.302699 | 0.09245 | 7861524  | 7911699  |
| X | 7948798  | 7941398  | 7953580  | 36 | 0.19799 | 0.033253 | 0.283945 | 0.16795 | 7916942  | 7969193  |
| X | 11861727 | 11844905 | 11868688 | 53 | 0.21433 | 0.014464 | 0.282699 | 0.06748 | 11814739 | 11927404 |
| X | 12935672 | 12927535 | 12948562 | 49 | 0.18436 | 0.029031 | 0.28173  | 0.15747 | 12895645 | 12988368 |
| X | 3957214  | 3944332  | 3970619  | 40 | 0.15107 | 0.084083 | 0.278962 | 0.55657 | 3933125  | 4026937  |
| X | 8478688  | 8467678  | 8487755  | 58 | 0.20021 | 0.010727 | 0.25654  | 0.05358 | 8451874  | 8507073  |
| X | 12226331 | 12215913 | 12238804 | 50 | 0.16913 | 0.031799 | 0.256332 | 0.18801 | 12142742 | 12349408 |
| X | 9481220  | 9469208  | 9493071  | 46 | 0.13772 | 0.067647 | 0.249827 | 0.49121 | 9384519  | 9508117  |
| X | 3713024  | 3694667  | 3724698  | 36 | 0.13737 | 0.076332 | 0.242007 | 0.55567 | 3572960  | 3815005  |
| X | 8023869  | 8008558  | 8033778  | 40 | 0.14879 | 0.040277 | 0.234048 | 0.2707  | 7996001  | 8042566  |
| X | 4177246  | 4165088  | 4190846  | 54 | 0.15599 | 0.022976 | 0.233218 | 0.14729 | 4139065  | 4234689  |
| X | 14076066 | 14065282 | 14093294 | 53 | 0.1283  | 0.041799 | 0.232111 | 0.32578 | 13967310 | 14128149 |
| X | 14536884 | 14524212 | 14550182 | 49 | 0.12561 | 0.04917  | 0.229689 | 0.39146 | 14435996 | 14560204 |
| X | 15948240 | 15938738 | 15959787 | 44 | 0.13294 | 0.042941 | 0.224706 | 0.32301 | 15902176 | 16006331 |
| X | 3539379  | 3521037  | 3559623  | 38 | 0.13176 | 0.055329 | 0.222837 | 0.41991 | 3482388  | 3572960  |
| X | 15080188 | 15074456 | 15088727 | 29 | 0.13702 | 0.09218  | 0.22173  | 0.67273 | 15050195 | 15131370 |
| X | 6560889  | 6549238  | 6574016  | 54 | 0.13564 | 0.027128 | 0.217024 | 0.2     | 6480992  | 6599292  |
| X | 5970861  | 5942346  | 5983130  | 53 | 0.12228 | 0.042561 | 0.215294 | 0.34805 | 5910382  | 6049735  |
| X | 17189687 | 17171132 | 17201345 | 59 | 0.10789 | 0.052526 | 0.199239 | 0.48685 | 17149196 | 17245243 |
| X | 17866351 | 17844284 | 17883005 | 64 | 0.10332 | 0.050692 | 0.197785 | 0.49062 | 17765899 | 17936971 |
| X | 19394046 | 19376416 | 19407694 | 40 | 0.12547 | 0.045744 | 0.195225 | 0.36459 | 19249420 | 19458328 |
| X | 11138825 | 11123366 | 11152969 | 61 | 0.14443 | 0.015675 | 0.195087 | 0.10853 | 11089796 | 11193834 |
| X | 2300936  | 2284357  | 2318347  | 76 | 0.10083 | 0.045467 | 0.194948 | 0.45093 | 2275448  | 2318347  |
| X | 14868804 | 14859844 | 14880816 | 63 | 0.15253 | 0.010796 | 0.192388 | 0.07078 | 14827438 | 14887275 |
| X | 17097153 | 17077165 | 17109160 | 69 | 0.09785 | 0.050484 | 0.184913 | 0.51591 | 17062630 | 17132920 |
| X | 6203962  | 6186180  | 6215392  | 59 | 0.11239 | 0.025882 | 0.178131 | 0.2303  | 6138159  | 6242608  |

|   |          |          |          |    |         |          |          |         |          |          |
|---|----------|----------|----------|----|---------|----------|----------|---------|----------|----------|
| X | 2098546  | 2079563  | 2115945  | 61 | 0.10837 | 0.025294 | 0.169412 | 0.2334  | 2055981  | 2165177  |
| X | 10717320 | 10706293 | 10728949 | 63 | 0.0973  | 0.030311 | 0.167336 | 0.31152 | 10683822 | 10733254 |
| X | 6728581  | 6704996  | 6746885  | 60 | 0.10339 | 0.033322 | 0.165675 | 0.32229 | 6646146  | 6769311  |
| X | 5520679  | 5503039  | 5533486  | 61 | 0.09433 | 0.049481 | 0.164083 | 0.52458 | 5467442  | 5613290  |
| X | 5639244  | 5624079  | 5655140  | 68 | 0.09253 | 0.057093 | 0.163391 | 0.61705 | 5613290  | 5673600  |
| X | 19176945 | 19150151 | 19200931 | 76 | 0.14055 | 0.007543 | 0.162007 | 0.05367 | 19113297 | 19249420 |
| X | 10156311 | 10143839 | 10173367 | 83 | 0.13965 | 0.006644 | 0.161107 | 0.04757 | 10131179 | 10179241 |



S2 Table: Parameter space explored using msms. Center line separates selection from selection with demography.

|                                             | PC Start | Severity | PC end   | Start Selection | s       | $4N_e\mu_A$ | f start   | f end |
|---------------------------------------------|----------|----------|----------|-----------------|---------|-------------|-----------|-------|
| <i>Soft sweep from repeated mutation</i>    | -        | -        | -        | -               | 0.1     | 0.3         |           | 1     |
| <i>Hard sweep</i>                           | -        | -        | -        | -               | 0.1     | 0           |           | 1     |
| <i>Incomplete sweep</i>                     | -        | -        | -        | -               | 0.1     | 0           |           | 0.5   |
| <i>Soft sweep from standing variation</i>   |          |          |          | 0.00005         | 0.1     |             | 0.0000125 |       |
|                                             |          |          |          | 0.00005         | 0.1     |             | 0.000005  |       |
|                                             |          |          |          | 0.00009         | 0.1     |             | 0.0000125 |       |
|                                             |          |          |          | 0.00009         | 0.1     |             | 0.000005  |       |
| <i>Balancing selection with contraction</i> |          |          |          |                 |         |             |           |       |
|                                             | 0.000125 | 0.01     | 0.0003   | 0.000125        | 0.1/het | -           |           |       |
|                                             | 0.000125 | 0.01     | 0.0003   | 0.0003          | 0.1/het | -           |           |       |
|                                             | 0.00005  | 0.01     | 0.000125 | 0.000125        | 0.1/het | -           |           |       |
|                                             | 0.00005  | 0.001    | 0.000125 | 0.0003          | 0.1/het | -           |           |       |
| <i>Hard sweeps with contraction</i>         |          |          |          |                 |         |             |           |       |
|                                             | 0.000125 | 0.01     | 0.0003   | 0.0003          | 0.1     | -           |           |       |
|                                             | 0.00005  | 0.01     | 0.000125 | 0.0003          | 0.1     | -           |           |       |
|                                             | 0.00005  | 0.001    | 0.000125 | 0.0003          | 0.1     | -           |           |       |
| <i>Soft sweeps with contraction</i>         |          |          |          |                 |         |             |           |       |
|                                             | 0.000125 | 0.01     | 0.0003   | 0.0003          | 0.1     | 0.2         |           |       |
|                                             | 0.000125 | 0.01     | 0.0003   | 0.0003          | 0.1     | 0.3         |           |       |
|                                             | 0.000125 | 0.01     | 0.0003   | 0.0003          | 0.1     | 0.4         |           |       |
|                                             | 0.000125 | 0.01     | 0.0003   | 0.0003          | 0.1     | 0.5         |           |       |
|                                             | 0.000125 | 0.01     | 0.0003   | 0.000125        | 0.1     | 0.2         |           |       |
|                                             | 0.00005  | 0.01     | 0.000125 | 0.000125        | 0.1     | 0.3         |           |       |
|                                             | 0.00005  | 0.01     | 0.000125 | 0.000125        | 0.1     | 0.5         |           |       |
|                                             | 0.00005  | 0.01     | 0.000125 | 0.0003          | 0.1     | 0.3         |           |       |
|                                             | 0.00005  | 0.001    | 0.000125 | 0.0003          | 0.1     | 0.3         |           |       |
| <i>Soft sweep from SGV with contraction</i> |          |          |          |                 |         |             |           |       |
|                                             | 0.00005  | 0.001    | 0.000125 | 0.00005         | 0.1     |             | 0.0000125 |       |
|                                             | 0.00005  | 0.001    | 0.000125 | 0.00005         | 0.1     |             | 0.000005  |       |
|                                             | 0.00005  | 0.001    | 0.000125 | 0.00009         | 0.1     |             | 0.0000125 |       |
|                                             | 0.00005  | 0.001    | 0.000125 | 0.00009         | 0.1     |             | 0.000005  |       |
